# Supplementary material
Source: publisher figshare collection journal article supplement (https://tandf.figshare.com/articles/dataset/_/9887552)
Supplement: Supplementary file 1 [file 1]

| **Additional file 3 – Mean (SD) volumes of healthcare utilisation 0-12 months** | | | | | | | | | | | |
| --- | --- | --- | --- | --- | --- | --- | --- | --- | --- | --- | --- |
|  | Usual care group (n=159) | | | | |  | Intervention group (n=130) | | | | |
| Care category | Mean | (SD) | Median | Min | Max |  | Mean | (SD) | Median | Min | Max |
| *Primary care* |  |  |  |  |  |  |  |  |  |  |  |
| General practitioner (contacts) | 12.7 | (9.7) | 11 | 0 | 63 |  | 11.4 | (8.5) | 10 | 0 | 46 |
| Consultation | 6.5 | (6.3) | 5 | 0 | 51 |  | 6.5 | (6.0) | 5 | 0 | 45 |
| Telephone consultation | 4.1 | (4.6) | 2 | 0 | 22 |  | 3.3 | (4.0) | 2 | 0 | 23 |
| Home visit | 2.1 | (4.2) | 0 | 0 | 24 |  | 1.6 | (2.7) | 0 | 0 | 12 |
| Physiotherapy (contracts) | 22.6 | (31.8) | 8 | 0 | 144 |  | 23.7 | (28.1) | 12.5 | 0 | 112 |
| Other therapists (contacts) | 2.6 | (6.6) | 0 | 0 | 51 |  | 3.8 | (13.3) | 0 | 0 | 104 |
| *Hospital care* |  |  |  |  |  |  |  |  |  |  |  |
| Admission (days) | 2.2 | (7.6) | 0 | 0 | 76 |  | 2.4 | (8.3) | 0 | 0 | 56 |
| Medical specialists (contacts) | 7.1 | (6.6) | 5 | 0 | 33 |  | 6.9 | (7.1) | 5 | 0 | 44 |
| *Patient and family* |  |  |  |  |  |  |  |  |  |  |  |
| Professional home care (hours) | 22.4 | (59.3) | 0 | 0 | 337 |  | 12.9 | (38.4) | 0 | 0 | 247 |
| Professional domestic help   (hours) | 95.4 | (108.6) | 27 | 0 | 364 |  | 83.8 | (100.3) | 0 | 0 | 312 |
| Domestic help (hours) | 30.5 | (65.8) | 0 | 0 | 324 |  | 31.7 | (62.1) | 0 | 0 | 260 |
| Informal care (hours) | 68.5 | (165.6) | 5 | 0 | 1340 |  | 50.6 | (99.9) | 5 | 0 | 540 |
| Home adaptations (number) | 0.5 | (1.3) | 0 | 0 | 9 |  | 0.5 | (1.1) | 0 | 0 | 6 |
| Aids and assistive devices   (number) | 1.2 | (1.5) | 1 | 0 | 9 |  | 1.2 | (1.3) | 1 | 0 | 6 |
